# Supplementary material for: Field-Theoretic Simulations for Block Copolymer Melts Using the Partial Saddle-Point Approximation
Source: MDPI journal article supplement (doi:10.3390/polym13152437), 2021-07-24
Supplement: s1 [file s1]

## Supplementary Materials: Field-Theoretic Simulations for Block Copolymer Melts using the Partial Saddle-Point Approximation

Mark W. Matsen and Thomas M. Beardsley

*Department of Chemical Engineering, Department of Physics & Astronomy, and Waterloo  
Institute for Nanotechnology, University of Waterloo, Waterloo, Ontario, N2L 3G1 Canada*

Here we provide stripped-down versions of the FTS program for CPUs and GPUs with a sample input file corresponding to eight unit cells of the gyroid phase for  $N_A = 36$ ,  $N_B = 54$ , and  $\chi N = 14.3$  (i.e.,  $\chi_b N = 18.35$ ). We leave it to individual users to modify the code to their own tastes. The files are as follows:

**fts.cc:** The source-code for the CPU version of the program. Compilation requires the external library FFTW3 for fast Fourier transforms ([www.fftw.org](http://www.fftw.org)). The dependencies, `random.h`, and `sim_eq.h`, need to be present in the same directory as the source code. The executable file must be run in the same directory containing the input file.

**fts.cu:** The source-code for the GPU version of the program. Compilation requires the external library CUFFT for fast Fourier transforms ([docs.nvidia.com](http://docs.nvidia.com)). The dependencies, `random.h`, `sim_eq.h`, `GPUerror.h`, and `GPUkernels.h` need to be present in the same directory as the source code. The executable file must be run in the same directory containing the input file.

**sim\_eq.h:** Required dependency for both the CPU and GPU source codes. It solves the simultaneous equations in the Anderson mixing algorithm; see Equation (32) in the main paper.

**random.h:** Required dependency for both the CPU and GPU source codes. It generates random numbers for  $\mathcal{N}(\mu, \sigma)$ ; see Equation (36) in the main paper.

**GPUerror.h:** Required dependency for the GPU source code. Produces an error message in the event that the program fails.

**GPUkernels.h:** Required dependency for the GPU source code. Contains GPU subroutines for preparing  $h_i(\mathbf{r})$ , calculating  $\phi_{\pm}(\mathbf{r})$ , and performing general array operations.

**input:** The input file containing system parameters and the initial fields. The first line lists  $N$ ,  $N_A$ ,  $\chi_b N$ ,  $\sqrt{N}$ , and  $\delta\tau N$ , the second line lists  $m_x$ ,  $m_y$ ,  $m_z$ ,  $L_x/R_0$ ,  $L_y/R_0$ , and  $L_z/R_0$ , and the third line lists the number of equilibration steps, the number of simulation steps, and the frequency at which observables are sampled. The subsequent lines contain  $NW_-(\mathbf{r})$  followed by  $Nw_+(\mathbf{r})$  as one-dimensional arrays. The arrays are indexed by  $r = (xm_x + y)m_y + z$ , where the grid coordinates  $(x, y, z)$  take on values  $x = 0$  to  $m_x - 1$ ,  $y = 0$  to  $m_y - 1$ , and  $z = 0$  to  $m_z - 1$ .

**output:** An output file providing the system parameters and the final fields. The format is identical to that of the input file.

**struct:** An output file containing the spherically-averaged structure function. The lines contain pairs of  $kR_0$  and  $S(k)/\rho_0 N$  in sequential order of increasing wavevector,  $k$ .
